# Supplementary material
Source: Research Square preprint supplement (doi:10.21203/rs.3.rs-9660701/v1)
Supplement: Supplementary file 1 [file 246c9ae26d46be26e54f524e.docx]

**Additional Files**

**Additional File-2**

(Selenium) AND ((((((((Epithelial Ovarian Cancer) OR (Ovarian Cancer)) OR (Gynecological Malignancies)) OR (Ovarian Carcinoma)) OR (Ovarian tumour)) OR (Ovarian tumor)) OR (ovarian malignancy)) OR (female malignancies)) Sort by: Publication Date

| **Search**  **number** | **Query** | **Sort**  **By** | **Filters** | **Search Details** |
| --- | --- | --- | --- | --- |
| **16** | (**Selenium) AND ((((((((Epithelial Ovarian Cancer) OR (Ovarian Cancer)) OR (Gynecological Malignancies)) OR (Ovarian Carcinoma)) OR (Ovarian tumour)) OR (Ovarian tumor)) OR (ovarian malignancy)) OR**  **(female malignancies))** | Publication Date | | ("selenium"[MeSH Terms] OR "selenium"[All Fields] OR "selenium s"[All  Fields] OR "seleniums"[All Fields]) AND ("carcinoma, ovarian epithelial"[MeSH Terms] OR ("carcinoma"[All Fields] AND "ovarian"[All Fields] AND "epithelial"[All Fields]) OR "ovarian epithelial carcinoma"[All Fields] OR ("epithelial"[All Fields] AND "ovarian"[All Fields] AND "cancer"[All Fields]) OR "epithelial ovarian cancer"[All Fields] OR ("ovarian neoplasms"[MeSH Terms] OR ("ovarian"[All Fields] AND "neoplasms"[All Fields]) OR "ovarian neoplasms"[All Fields] OR ("ovarian"[All Fields] AND "cancer"[All Fields]) OR "ovarian cancer"[All Fields]) OR (("gynaecologic"[All Fields] OR "gynecologic"[All Fields] OR "gynecologically"[All Fields] OR "gynecology"[MeSH Terms] OR "gynecology"[All Fields] OR "gynaecological"[All Fields] OR "gynecological"[All Fields]) AND ("malign"[All Fields] OR "malignance"[All Fields] OR "malignances"[All Fields] OR "malignant"[All Fields] OR "malignants"[All Fields] OR "malignities"[All Fields] OR "malignity"[All Fields] OR "malignization"[All Fields] OR "malignized"[All Fields] OR "maligns"[All Fields] OR "neoplasms"[MeSH Terms] OR "neoplasms"[All Fields] OR "malignancies"[All Fields] OR "malignancy"[All Fields])) OR ("ovarian neoplasms"[MeSH Terms] OR ("ovarian"[All Fields] AND "neoplasms"[All Fields]) OR "ovarian neoplasms"[All Fields] OR ("ovarian"[All Fields] AND "carcinoma"[All Fields]) OR "ovarian carcinoma"[All Fields]) OR ("ovarian neoplasms"[MeSH Terms] OR ("ovarian"[All Fields] AND "neoplasms"[All Fields]) OR "ovarian neoplasms"[All Fields] OR ("ovarian"[All Fields] AND "tumour"[All Fields]) OR "ovarian tumour"[All Fields]) OR ("ovarian neoplasms"[MeSH Terms] OR ("ovarian"[All Fields] AND "neoplasms"[All Fields]) OR "ovarian neoplasms"[All Fields] OR ("ovarian"[All Fields] AND "tumor"[All Fields]) OR "ovarian tumor"[All Fields]) OR (("ovarian"[All Fields] OR "ovarians"[All Fields]) AND ("malign"[All Fields] OR "malignance"[All Fields] OR "malignances"[All Fields] OR "malignant"[All Fields] OR "malignants"[All Fields] OR "malignities"[All Fields] OR "malignity"[All Fields] OR "malignization"[All Fields] OR "malignized"[All Fields] OR "maligns"[All Fields] OR "neoplasms"[MeSH Terms] OR "neoplasms"[All Fields] OR "malignancies"[All Fields] OR "malignancy"[All Fields])) OR (("femal"[All Fields] OR "female"[MeSH Terms] OR "female"[All Fields] OR "females"[All Fields] OR "female s"[All Fields] OR "femals"[All Fields]) AND ("malign"[All Fields] OR "malignance"[All Fields] OR "malignances"[All Fields] OR "malignant"[All Fields] OR "malignants"[All Fields] OR "malignities"[All Fields] OR "malignity"[All Fields] OR "malignization"[All Fields] OR "malignized"[All Fields] OR "maligns"[All Fields] OR "neoplasms"[MeSH Terms] OR "neoplasms"[All Fields] OR  "malignancies"[All Fields] OR "malignancy"[All Fields]))) |

| **15** | **(((((((Epithelial Ovarian Cancer) OR (Ovarian Cancer)) OR (Gynecological Malignancies)) OR (Ovarian Carcinoma)) OR (Ovarian tumour)) OR (Ovarian tumor)) OR (ovarian malignancy))**  **OR (female malignancies)** | Publication Date | "carcinoma, ovarian epithelial"[MeSH Terms] OR ("carcinoma"[All Fields]  AND "ovarian"[All Fields] AND "epithelial"[All Fields]) OR "ovarian epithelial carcinoma"[All Fields] OR ("epithelial"[All Fields] AND "ovarian"[All Fields] AND "cancer"[All Fields]) OR "epithelial ovarian cancer"[All Fields] OR ("ovarian neoplasms"[MeSH Terms] OR ("ovarian"[All Fields] AND "neoplasms"[All Fields]) OR "ovarian neoplasms"[All Fields] OR ("ovarian"[All Fields] AND "cancer"[All Fields]) OR "ovarian cancer"[All Fields]) OR (("gynaecologic"[All Fields] OR "gynecologic"[All Fields] OR "gynecologically"[All Fields] OR "gynecology"[MeSH Terms] OR "gynecology"[All Fields] OR "gynaecological"[All Fields] OR "gynecological"[All Fields]) AND ("malign"[All Fields] OR "malignance"[All Fields] OR "malignances"[All Fields] OR "malignant"[All Fields] OR "malignants"[All Fields] OR "malignities"[All Fields] OR "malignity"[All Fields] OR "malignization"[All Fields] OR "malignized"[All Fields] OR "maligns"[All Fields] OR "neoplasms"[MeSH Terms] OR "neoplasms"[All Fields] OR "malignancies"[All Fields] OR "malignancy"[All Fields])) OR ("ovarian neoplasms"[MeSH Terms] OR ("ovarian"[All Fields] AND "neoplasms"[All Fields]) OR "ovarian neoplasms"[All Fields] OR ("ovarian"[All Fields] AND "carcinoma"[All Fields]) OR "ovarian carcinoma"[All Fields]) OR ("ovarian neoplasms"[MeSH Terms] OR ("ovarian"[All Fields] AND "neoplasms"[All Fields]) OR "ovarian neoplasms"[All Fields] OR ("ovarian"[All Fields] AND "tumour"[All Fields]) OR "ovarian tumour"[All Fields]) OR ("ovarian neoplasms"[MeSH Terms] OR ("ovarian"[All Fields] AND "neoplasms"[All Fields]) OR "ovarian neoplasms"[All Fields] OR ("ovarian"[All Fields] AND "tumor"[All Fields]) OR "ovarian tumor"[All Fields]) OR (("ovarian"[All Fields] OR "ovarians"[All Fields]) AND ("malign"[All Fields] OR "malignance"[All Fields] OR "malignances"[All Fields] OR "malignant"[All Fields] OR "malignants"[All Fields] OR "malignities"[All Fields] OR "malignity"[All Fields] OR "malignization"[All Fields] OR "malignized"[All Fields] OR "maligns"[All Fields] OR "neoplasms"[MeSH Terms] OR "neoplasms"[All Fields] OR "malignancies"[All Fields] OR "malignancy"[All Fields])) OR (("femal"[All Fields] OR "female"[MeSH Terms] OR "female"[All Fields] OR "females"[All Fields] OR "female s"[All Fields] OR "femals"[All Fields]) AND ("malign"[All Fields] OR "malignance"[All Fields] OR "malignances"[All Fields] OR "malignant"[All Fields] OR "malignants"[All Fields] OR "malignities"[All Fields] OR "malignity"[All Fields] OR "malignization"[All Fields] OR "malignized"[All Fields] OR "maligns"[All Fields] OR "neoplasms"[MeSH  Terms] OR "neoplasms"[All Fields] OR "malignancies"[All Fields] OR "malignancy"[All Fields])) |
| --- | --- | --- | --- |
| **14** | **female malignancies** | Publication Date | ("femal"[All Fields] OR "female"[MeSH Terms] OR "female"[All Fields] OR  "females"[All Fields] OR "female s"[All Fields] OR "femals"[All Fields]) AND ("malign"[All Fields] OR "malignance"[All Fields] OR "malignances"[All Fields] OR "malignant"[All Fields] OR "malignants"[All Fields] OR "malignities"[All Fields] OR "malignity"[All Fields] OR "malignization"[All  Fields] OR "malignized"[All Fields] OR "maligns"[All Fields] OR |

|  |  |  | "neoplasms"[MeSH Terms] OR "neoplasms"[All Fields] OR  "malignancies"[All Fields] OR "malignancy"[All Fields]) |
| --- | --- | --- | --- |
| 13 | **(((((((Epithelial Ovarian Cancer) OR (Ovarian Cancer)) OR (Gynecological Malignancies)) OR (Ovarian Carcinoma)) OR (Ovarian tumour)) OR (Ovarian tumor)) OR (ovarian malignancy))**  **AND (Selenium)** | Publication Date | ("carcinoma, ovarian epithelial"[MeSH Terms] OR ("carcinoma"[All Fields]  AND "ovarian"[All Fields] AND "epithelial"[All Fields]) OR "ovarian epithelial carcinoma"[All Fields] OR ("epithelial"[All Fields] AND "ovarian"[All Fields] AND "cancer"[All Fields]) OR "epithelial ovarian cancer"[All Fields] OR ("ovarian neoplasms"[MeSH Terms] OR ("ovarian"[All Fields] AND "neoplasms"[All Fields]) OR "ovarian neoplasms"[All Fields] OR ("ovarian"[All Fields] AND "cancer"[All Fields]) OR "ovarian cancer"[All Fields]) OR (("gynaecologic"[All Fields] OR "gynecologic"[All Fields] OR "gynecologically"[All Fields] OR "gynecology"[MeSH Terms] OR "gynecology"[All Fields] OR "gynaecological"[All Fields] OR "gynecological"[All Fields]) AND ("malign"[All Fields] OR "malignance"[All Fields] OR "malignances"[All Fields] OR "malignant"[All Fields] OR "malignants"[All Fields] OR "malignities"[All Fields] OR "malignity"[All Fields] OR "malignization"[All Fields] OR "malignized"[All Fields] OR "maligns"[All Fields] OR "neoplasms"[MeSH Terms] OR "neoplasms"[All Fields] OR "malignancies"[All Fields] OR "malignancy"[All Fields])) OR ("ovarian neoplasms"[MeSH Terms] OR ("ovarian"[All Fields] AND "neoplasms"[All Fields]) OR "ovarian neoplasms"[All Fields] OR ("ovarian"[All Fields] AND "carcinoma"[All Fields]) OR "ovarian carcinoma"[All Fields]) OR ("ovarian neoplasms"[MeSH Terms] OR ("ovarian"[All Fields] AND "neoplasms"[All Fields]) OR "ovarian neoplasms"[All Fields] OR ("ovarian"[All Fields] AND "tumour"[All Fields]) OR "ovarian tumour"[All Fields]) OR ("ovarian neoplasms"[MeSH Terms] OR ("ovarian"[All Fields] AND "neoplasms"[All Fields]) OR "ovarian neoplasms"[All Fields] OR ("ovarian"[All Fields] AND "tumor"[All Fields]) OR "ovarian tumor"[All Fields]) OR (("ovarian"[All Fields] OR "ovarians"[All Fields]) AND ("malign"[All Fields] OR "malignance"[All Fields] OR "malignances"[All Fields] OR "malignant"[All Fields] OR "malignants"[All Fields] OR "malignities"[All Fields] OR "malignity"[All Fields] OR "malignization"[All Fields] OR "malignized"[All Fields] OR "maligns"[All Fields] OR "neoplasms"[MeSH Terms] OR "neoplasms"[All Fields] OR "malignancies"[All Fields] OR "malignancy"[All Fields]))) AND ("selenium"[MeSH Terms] OR "selenium"[All Fields] OR "selenium s"[All  Fields] OR "seleniums"[All Fields]) |
| **12** | **((((((Epithelial Ovarian Cancer) OR (Ovarian Cancer)) OR (Gynecological Malignancies)) OR (Ovarian Carcinoma)) OR (Ovarian tumour))**  **OR (Ovarian tumor)) OR (ovarian malignancy)** | Publication Date | "carcinoma, ovarian epithelial"[MeSH Terms] OR ("carcinoma"[All Fields]  AND "ovarian"[All Fields] AND "epithelial"[All Fields]) OR "ovarian epithelial carcinoma"[All Fields] OR ("epithelial"[All Fields] AND "ovarian"[All Fields] AND "cancer"[All Fields]) OR "epithelial ovarian cancer"[All Fields] OR ("ovarian neoplasms"[MeSH Terms] OR ("ovarian"[All Fields] AND "neoplasms"[All Fields]) OR "ovarian neoplasms"[All Fields] OR ("ovarian"[All Fields] AND "cancer"[All Fields]) OR "ovarian cancer"[All Fields]) OR (("gynaecologic"[All Fields] OR "gynecologic"[All Fields] OR "gynecologically"[All Fields] OR "gynecology"[MeSH Terms] OR "gynecology"[All Fields] OR "gynaecological"[All Fields] OR  "gynecological"[All Fields]) AND ("malign"[All Fields] OR "malignance"[All |

|  |  |  | Fields] OR "malignances"[All Fields] OR "malignant"[All Fields] OR  "malignants"[All Fields] OR "malignities"[All Fields] OR "malignity"[All Fields] OR "malignization"[All Fields] OR "malignized"[All Fields] OR "maligns"[All Fields] OR "neoplasms"[MeSH Terms] OR "neoplasms"[All Fields] OR "malignancies"[All Fields] OR "malignancy"[All Fields])) OR ("ovarian neoplasms"[MeSH Terms] OR ("ovarian"[All Fields] AND "neoplasms"[All Fields]) OR "ovarian neoplasms"[All Fields] OR ("ovarian"[All Fields] AND "carcinoma"[All Fields]) OR "ovarian carcinoma"[All Fields]) OR ("ovarian neoplasms"[MeSH Terms] OR ("ovarian"[All Fields] AND "neoplasms"[All Fields]) OR "ovarian neoplasms"[All Fields] OR ("ovarian"[All Fields] AND "tumour"[All Fields]) OR "ovarian tumour"[All Fields]) OR ("ovarian neoplasms"[MeSH Terms] OR ("ovarian"[All Fields] AND "neoplasms"[All Fields]) OR "ovarian neoplasms"[All Fields] OR ("ovarian"[All Fields] AND "tumor"[All Fields]) OR "ovarian tumor"[All Fields]) OR (("ovarian"[All Fields] OR "ovarians"[All Fields]) AND ("malign"[All Fields] OR "malignance"[All Fields] OR "malignances"[All Fields] OR "malignant"[All Fields] OR "malignants"[All Fields] OR "malignities"[All Fields] OR "malignity"[All Fields] OR "malignization"[All Fields] OR "malignized"[All Fields] OR "maligns"[All Fields] OR "neoplasms"[MeSH Terms] OR "neoplasms"[All Fields] OR  "malignancies"[All Fields] OR "malignancy"[All Fields])) |
| --- | --- | --- | --- |
| **11** | **ovarian malignancy** | Publication Date | ("ovarian"[All Fields] OR "ovarians"[All Fields]) AND ("malign"[All Fields] OR  "malignance"[All Fields] OR "malignances"[All Fields] OR "malignant"[All Fields] OR "malignants"[All Fields] OR "malignities"[All Fields] OR "malignity"[All Fields] OR "malignization"[All Fields] OR "malignized"[All Fields] OR "maligns"[All Fields] OR "neoplasms"[MeSH Terms] OR "neoplasms"[All Fields] OR "malignancies"[All Fields] OR "malignancy"[All  Fields]) |
| **10** | (**Selenium) AND ((((((Epithelial Ovarian Cancer) OR (Ovarian Cancer)) OR (Gynecological Malignancies)) OR (Ovarian Carcinoma)) OR (Ovarian tumour)) OR**  **(Ovarian tumor))** | Publication Date | ("selenium"[MeSH Terms] OR "selenium"[All Fields] OR "selenium s"[All  Fields] OR "seleniums"[All Fields]) AND ("carcinoma, ovarian epithelial"[MeSH Terms] OR ("carcinoma"[All Fields] AND "ovarian"[All Fields] AND "epithelial"[All Fields]) OR "ovarian epithelial carcinoma"[All Fields] OR ("epithelial"[All Fields] AND "ovarian"[All Fields] AND "cancer"[All Fields]) OR "epithelial ovarian cancer"[All Fields] OR ("ovarian neoplasms"[MeSH Terms] OR ("ovarian"[All Fields] AND "neoplasms"[All Fields]) OR "ovarian neoplasms"[All Fields] OR ("ovarian"[All Fields] AND "cancer"[All Fields]) OR "ovarian cancer"[All Fields]) OR (("gynaecologic"[All Fields] OR "gynecologic"[All Fields] OR "gynecologically"[All Fields] OR "gynecology"[MeSH Terms] OR "gynecology"[All Fields] OR "gynaecological"[All Fields] OR "gynecological"[All Fields]) AND ("malign"[All Fields] OR "malignance"[All Fields] OR "malignances"[All Fields] OR "malignant"[All Fields] OR "malignants"[All Fields] OR "malignities"[All Fields] OR "malignity"[All Fields] OR "malignization"[All Fields] OR "malignized"[All Fields] OR "maligns"[All Fields] OR "neoplasms"[MeSH Terms] OR "neoplasms"[All Fields] OR "malignancies"[All Fields] OR "malignancy"[All Fields])) OR ("ovarian  neoplasms"[MeSH Terms] OR ("ovarian"[All Fields] AND "neoplasms"[All |

|  |  |  | Fields]) OR "ovarian neoplasms"[All Fields] OR ("ovarian"[All Fields] AND  "carcinoma"[All Fields]) OR "ovarian carcinoma"[All Fields]) OR ("ovarian neoplasms"[MeSH Terms] OR ("ovarian"[All Fields] AND "neoplasms"[All Fields]) OR "ovarian neoplasms"[All Fields] OR ("ovarian"[All Fields] AND "tumour"[All Fields]) OR "ovarian tumour"[All Fields]) OR ("ovarian neoplasms"[MeSH Terms] OR ("ovarian"[All Fields] AND "neoplasms"[All Fields]) OR "ovarian neoplasms"[All Fields] OR ("ovarian"[All Fields] AND  "tumor"[All Fields]) OR "ovarian tumor"[All Fields])) |
| --- | --- | --- | --- |
| **9** | **Selenium** | Publication  Date | "selenium"[MeSH Terms] OR "selenium"[All Fields] OR "selenium s"[All  Fields] OR "seleniums"[All Fields] |
| 8 | **(((((Epithelial Ovarian Cancer) OR (Ovarian Cancer)) OR (Gynecological Malignancies)) OR (Ovarian Carcinoma)) OR (Ovarian tumour))**  **OR (Ovarian tumor)** | Publication Date | "carcinoma, ovarian epithelial"[MeSH Terms] OR ("carcinoma"[All Fields]  AND "ovarian"[All Fields] AND "epithelial"[All Fields]) OR "ovarian epithelial carcinoma"[All Fields] OR ("epithelial"[All Fields] AND "ovarian"[All Fields] AND "cancer"[All Fields]) OR "epithelial ovarian cancer"[All Fields] OR ("ovarian neoplasms"[MeSH Terms] OR ("ovarian"[All Fields] AND "neoplasms"[All Fields]) OR "ovarian neoplasms"[All Fields] OR ("ovarian"[All Fields] AND "cancer"[All Fields]) OR "ovarian cancer"[All Fields]) OR (("gynaecologic"[All Fields] OR "gynecologic"[All Fields] OR "gynecologically"[All Fields] OR "gynecology"[MeSH Terms] OR "gynecology"[All Fields] OR "gynaecological"[All Fields] OR "gynecological"[All Fields]) AND ("malign"[All Fields] OR "malignance"[All Fields] OR "malignances"[All Fields] OR "malignant"[All Fields] OR "malignants"[All Fields] OR "malignities"[All Fields] OR "malignity"[All Fields] OR "malignization"[All Fields] OR "malignized"[All Fields] OR "maligns"[All Fields] OR "neoplasms"[MeSH Terms] OR "neoplasms"[All Fields] OR "malignancies"[All Fields] OR "malignancy"[All Fields])) OR ("ovarian neoplasms"[MeSH Terms] OR ("ovarian"[All Fields] AND "neoplasms"[All Fields]) OR "ovarian neoplasms"[All Fields] OR ("ovarian"[All Fields] AND "carcinoma"[All Fields]) OR "ovarian carcinoma"[All Fields]) OR ("ovarian neoplasms"[MeSH Terms] OR ("ovarian"[All Fields] AND "neoplasms"[All Fields]) OR "ovarian neoplasms"[All Fields] OR ("ovarian"[All Fields] AND "tumour"[All Fields]) OR "ovarian tumour"[All Fields]) OR ("ovarian neoplasms"[MeSH Terms] OR ("ovarian"[All Fields] AND "neoplasms"[All Fields]) OR "ovarian neoplasms"[All Fields] OR ("ovarian"[All Fields] AND "tumor"[All Fields]) OR  "ovarian tumor"[All Fields]) |
| 7 | **Ovarian tumor** | Publication Date | "ovarian neoplasms"[MeSH Terms] OR ("ovarian"[All Fields] AND  "neoplasms"[All Fields]) OR "ovarian neoplasms"[All Fields] OR ("ovarian"[All Fields] AND "tumor"[All Fields]) OR "ovarian tumor"[All  Fields] |
| 6 | **Ovarian tumour** | Publication Date | "ovarian neoplasms"[MeSH Terms] OR ("ovarian"[All Fields] AND  "neoplasms"[All Fields]) OR "ovarian neoplasms"[All Fields] OR ("ovarian"[All Fields] AND "tumour"[All Fields]) OR "ovarian tumour"[All  Fields] |
| 5 | **(((Epithelial Ovarian Cancer) OR (Ovarian**  **Cancer)) OR (Gynecological Malignancies)) OR**  **(Ovarian Carcinoma)** | Publication Date | "carcinoma, ovarian epithelial"[MeSH Terms] OR ("carcinoma"[All Fields]  AND "ovarian"[All Fields] AND "epithelial"[All Fields]) OR "ovarian epithelial  carcinoma"[All Fields] OR ("epithelial"[All Fields] AND "ovarian"[All Fields] |

|  |  |  | AND "cancer"[All Fields]) OR "epithelial ovarian cancer"[All Fields] OR  ("ovarian neoplasms"[MeSH Terms] OR ("ovarian"[All Fields] AND "neoplasms"[All Fields]) OR "ovarian neoplasms"[All Fields] OR ("ovarian"[All Fields] AND "cancer"[All Fields]) OR "ovarian cancer"[All Fields]) OR (("gynaecologic"[All Fields] OR "gynecologic"[All Fields] OR "gynecologically"[All Fields] OR "gynecology"[MeSH Terms] OR "gynecology"[All Fields] OR "gynaecological"[All Fields] OR "gynecological"[All Fields]) AND ("malign"[All Fields] OR "malignance"[All Fields] OR "malignances"[All Fields] OR "malignant"[All Fields] OR "malignants"[All Fields] OR "malignities"[All Fields] OR "malignity"[All Fields] OR "malignization"[All Fields] OR "malignized"[All Fields] OR "maligns"[All Fields] OR "neoplasms"[MeSH Terms] OR "neoplasms"[All Fields] OR "malignancies"[All Fields] OR "malignancy"[All Fields])) OR ("ovarian neoplasms"[MeSH Terms] OR ("ovarian"[All Fields] AND "neoplasms"[All Fields]) OR "ovarian neoplasms"[All Fields] OR ("ovarian"[All Fields] AND "carcinoma"[All Fields]) OR "ovarian  carcinoma"[All Fields]) |
| --- | --- | --- | --- |
| **4** | **Ovarian Carcinoma** | Publication Date | "ovarian neoplasms"[MeSH Terms] OR ("ovarian"[All Fields] AND  "neoplasms"[All Fields]) OR "ovarian neoplasms"[All Fields] OR ("ovarian"[All Fields] AND "carcinoma"[All Fields]) OR "ovarian  carcinoma"[All Fields] |
| **3** | **Gynecological Malignancies** | Publication Date | ("gynaecologic"[All Fields] OR "gynecologic"[All Fields] OR  "gynecologically"[All Fields] OR "gynecology"[MeSH Terms] OR "gynecology"[All Fields] OR "gynaecological"[All Fields] OR "gynecological"[All Fields]) AND ("malign"[All Fields] OR "malignance"[All Fields] OR "malignances"[All Fields] OR "malignant"[All Fields] OR "malignants"[All Fields] OR "malignities"[All Fields] OR "malignity"[All Fields] OR "malignization"[All Fields] OR "malignized"[All Fields] OR "maligns"[All Fields] OR "neoplasms"[MeSH Terms] OR "neoplasms"[All  Fields] OR "malignancies"[All Fields] OR "malignancy"[All Fields]) |
| **2** | **Ovarian Cancer** | Publication Date | "ovarian neoplasms"[MeSH Terms] OR ("ovarian"[All Fields] AND  "neoplasms"[All Fields]) OR "ovarian neoplasms"[All Fields] OR ("ovarian"[All Fields] AND "cancer"[All Fields]) OR "ovarian cancer"[All  Fields] |
| **1** | **Epithelial Ovarian Cancer** | Publication Date | "carcinoma, ovarian epithelial"[MeSH Terms] OR ("carcinoma"[All Fields]  AND "ovarian"[All Fields] AND "epithelial"[All Fields]) OR "ovarian epithelial carcinoma"[All Fields] OR ("epithelial"[All Fields] AND "ovarian"[All Fields]  AND "cancer"[All Fields]) OR "epithelial ovarian cancer"[All Fields] |

|  | **Author** | **Reason for exclusion** |
| --- | --- | --- |
| 1 | Sundstrom et al.1984 | Case-control study. Blood was drawn from ovarian cancer patients (after diagnosis) to determine the serum Se concentration. Therefore it cannot take as an assessment of the association between Se as an etiological  factor and Epithelial Ovarian Cancer. |
| 2 | Bierke & Svedfnstal (1994) | Animal study |
| 3 | Drózdz et al. (1989) | Case-control study. Blood was drawn from ovarian cancer patients (after diagnosis) to determine the serum Se concentration.  Therefore it cannot take as an assessment of the association between Se as an etiological factor and Epithelial Ovarian Cancer. |
| 4 | Argirovic et al.(1995) | Case-control study. Blood was drawn from ovarian cancer patients (after diagnosis) to determine the serum Se concentration.  Therefore it cannot take as an assessment of the association between Se as an etiological factor and Epithelial Ovarian Cancer. |
| 5 | Fengxia & Shiwei (1991) | Case-control study. Blood was drawn from ovarian cancer patients (after diagnosis) to determine the serum Se concentration.  Therefore it cannot take as an assessment of the association between Se as an etiological factor and Epithelial Ovarian Cancer. |
| 6 | Miiller-Lepper et al.(1993) | Case-control study. Blood was drawn from ovarian cancer patients (after diagnosis) to determine the serum Se concentration.  Therefore it cannot take as an assessment of the association between Se as an etiological factor and Epithelial Ovarian Cancer. |
| 7 | Caglayan et al.(2019) | Case-control study. Blood was drawn from ovarian cancer patients (after diagnosis) to determine the serum Se concentration.  Therefore it cannot take as an assessment of the association between Se as an etiological factor and Epithelial Ovarian Cancer. |
| 8 | Canaz et al.(2017) | Case-series |
| 9 | Chrissafidou et al. (2002) | Case-control study. Blood was drawn from ovarian cancer patients (after diagnosis) to determine the serum Se concentration.  Therefore it cannot take as an assessment of |

|  |  | the association between Se as an etiological  factor and Epithelial Ovarian Cancer. |
| --- | --- | --- |
| 10 | Das & Ma(1986) | Case-control study. Blood was drawn from ovarian cancer patients (after diagnosis) to determine the serum Se concentration.  Therefore it cannot take as an assessment of the association between Se as an etiological factor and Epithelial Ovarian Cancer. |
| 11 | Dziaman et al.(2009) | Randomized control study. Blood was drawn from ovarian cancer patients (after diagnosis) to determine the serum Se concentration.  Therefore it cannot take as an assessment of the association of Se as an etiological factor for Epithelial Ovarian Cancer. |
| 12 | Diet & Cancer (2014) | This abstract is a duplication of the study  included in the review (Gifkins et al.2012) |
| 13 | Gorozhanskaya et al.(2012) | Case-control study. There were no risk  estimates and also data was not provided to calculate risk estimates. |
| 14 | Guo et al.(2020) | This is a Mendelian randomization analysis. |
| 15 | Motevich et al. (2015) | Case-control study. The tissue concentration of Se of ovarian cancer patients (after diagnosis) was compared with the tissue concentration of Se of healthy ovaries.  Therefore it cannot take as an assessment of the association between Se as an etiological factor and Epithelial Ovarian Cancer. |
| 16 | Piekutowski et al.(2006) | Case-control study. Blood was drawn from ovarian cancer patients (after diagnosis) to determine the serum Se concentration.  Therefore it cannot take as an assessment of the association between Se as an etiological factor and Epithelial Ovarian Cancer. |
| 17 | Tan et al.(2018) | Case-series |
| 18 | Torun et al.(1995) | Case-control study. Blood was drawn from ovarian cancer patients (after diagnosis) to determine the serum Se concentration.  Therefore it cannot take as an assessment of the association between Se as an etiological factor and Epithelial Ovarian Cancer. |
| 19 | Vinceti et al.(2016) | It’s a review |
| 20 | Wadhwa et al. (2015) | Case-control study. There were no risk estimates and also data was not provided to  calculate risk estimates. |
