# Supplementary material
Source: Research Square preprint supplement (doi:10.21203/rs.3.rs-9660701/v1)
Supplement: Supplementary file 4 [file c211d2b644d6792900ff6ccd.docx]

Annexure-2

(Selenium) AND ((((((((Epithelial Ovarian Cancer) OR (Ovarian Cancer)) OR (Gynecological Malignancies)) OR (Ovarian Carcinoma)) OR (Ovarian tumour)) OR (Ovarian tumor)) OR (ovarian malignancy)) OR (female malignancies)) Sort by: Publication Date

| **Search**  **number** | **Query** | **Sort**  **By** | **Filters** | **Search Details** |
| --- | --- | --- | --- | --- |
| **16** | (**Selenium) AND ((((((((Epithelial Ovarian Cancer) OR (Ovarian Cancer)) OR (Gynecological Malignancies)) OR (Ovarian Carcinoma)) OR (Ovarian tumour)) OR (Ovarian tumor)) OR (ovarian malignancy)) OR**  **(female malignancies))** | Publication Date | | ("selenium"[MeSH Terms] OR "selenium"[All Fields] OR "selenium s"[All  Fields] OR "seleniums"[All Fields]) AND ("carcinoma, ovarian epithelial"[MeSH Terms] OR ("carcinoma"[All Fields] AND "ovarian"[All Fields] AND "epithelial"[All Fields]) OR "ovarian epithelial carcinoma"[All Fields] OR ("epithelial"[All Fields] AND "ovarian"[All Fields] AND "cancer"[All Fields]) OR "epithelial ovarian cancer"[All Fields] OR ("ovarian neoplasms"[MeSH Terms] OR ("ovarian"[All Fields] AND "neoplasms"[All Fields]) OR "ovarian neoplasms"[All Fields] OR ("ovarian"[All Fields] AND "cancer"[All Fields]) OR "ovarian cancer"[All Fields]) OR (("gynaecologic"[All Fields] OR "gynecologic"[All Fields] OR "gynecologically"[All Fields] OR "gynecology"[MeSH Terms] OR "gynecology"[All Fields] OR "gynaecological"[All Fields] OR "gynecological"[All Fields]) AND ("malign"[All Fields] OR "malignance"[All Fields] OR "malignances"[All Fields] OR "malignant"[All Fields] OR "malignants"[All Fields] OR "malignities"[All Fields] OR "malignity"[All Fields] OR "malignization"[All Fields] OR "malignized"[All Fields] OR "maligns"[All Fields] OR "neoplasms"[MeSH Terms] OR "neoplasms"[All Fields] OR "malignancies"[All Fields] OR "malignancy"[All Fields])) OR ("ovarian neoplasms"[MeSH Terms] OR ("ovarian"[All Fields] AND "neoplasms"[All Fields]) OR "ovarian neoplasms"[All Fields] OR ("ovarian"[All Fields] AND "carcinoma"[All Fields]) OR "ovarian carcinoma"[All Fields]) OR ("ovarian neoplasms"[MeSH Terms] OR ("ovarian"[All Fields] AND "neoplasms"[All Fields]) OR "ovarian neoplasms"[All Fields] OR ("ovarian"[All Fields] AND "tumour"[All Fields]) OR "ovarian tumour"[All Fields]) OR ("ovarian neoplasms"[MeSH Terms] OR ("ovarian"[All Fields] AND "neoplasms"[All Fields]) OR "ovarian neoplasms"[All Fields] OR ("ovarian"[All Fields] AND "tumor"[All Fields]) OR "ovarian tumor"[All Fields]) OR (("ovarian"[All Fields] OR "ovarians"[All Fields]) AND ("malign"[All Fields] OR "malignance"[All Fields] OR "malignances"[All Fields] OR "malignant"[All Fields] OR "malignants"[All Fields] OR "malignities"[All Fields] OR "malignity"[All Fields] OR "malignization"[All Fields] OR "malignized"[All Fields] OR "maligns"[All Fields] OR "neoplasms"[MeSH Terms] OR "neoplasms"[All Fields] OR "malignancies"[All Fields] OR "malignancy"[All Fields])) OR (("femal"[All Fields] OR "female"[MeSH Terms] OR "female"[All Fields] OR "females"[All Fields] OR "female s"[All Fields] OR "femals"[All Fields]) AND ("malign"[All Fields] OR "malignance"[All Fields] OR "malignances"[All Fields] OR "malignant"[All Fields] OR "malignants"[All Fields] OR "malignities"[All Fields] OR "malignity"[All Fields] OR "malignization"[All Fields] OR "malignized"[All Fields] OR "maligns"[All Fields] OR "neoplasms"[MeSH Terms] OR "neoplasms"[All Fields] OR  "malignancies"[All Fields] OR "malignancy"[All Fields]))) |

| **15** | **(((((((Epithelial Ovarian Cancer) OR (Ovarian Cancer)) OR (Gynecological Malignancies)) OR (Ovarian Carcinoma)) OR (Ovarian tumour)) OR (Ovarian tumor)) OR (ovarian malignancy))**  **OR (female malignancies)** | Publication Date | "carcinoma, ovarian epithelial"[MeSH Terms] OR ("carcinoma"[All Fields]  AND "ovarian"[All Fields] AND "epithelial"[All Fields]) OR "ovarian epithelial carcinoma"[All Fields] OR ("epithelial"[All Fields] AND "ovarian"[All Fields] AND "cancer"[All Fields]) OR "epithelial ovarian cancer"[All Fields] OR ("ovarian neoplasms"[MeSH Terms] OR ("ovarian"[All Fields] AND "neoplasms"[All Fields]) OR "ovarian neoplasms"[All Fields] OR ("ovarian"[All Fields] AND "cancer"[All Fields]) OR "ovarian cancer"[All Fields]) OR (("gynaecologic"[All Fields] OR "gynecologic"[All Fields] OR "gynecologically"[All Fields] OR "gynecology"[MeSH Terms] OR "gynecology"[All Fields] OR "gynaecological"[All Fields] OR "gynecological"[All Fields]) AND ("malign"[All Fields] OR "malignance"[All Fields] OR "malignances"[All Fields] OR "malignant"[All Fields] OR "malignants"[All Fields] OR "malignities"[All Fields] OR "malignity"[All Fields] OR "malignization"[All Fields] OR "malignized"[All Fields] OR "maligns"[All Fields] OR "neoplasms"[MeSH Terms] OR "neoplasms"[All Fields] OR "malignancies"[All Fields] OR "malignancy"[All Fields])) OR ("ovarian neoplasms"[MeSH Terms] OR ("ovarian"[All Fields] AND "neoplasms"[All Fields]) OR "ovarian neoplasms"[All Fields] OR ("ovarian"[All Fields] AND "carcinoma"[All Fields]) OR "ovarian carcinoma"[All Fields]) OR ("ovarian neoplasms"[MeSH Terms] OR ("ovarian"[All Fields] AND "neoplasms"[All Fields]) OR "ovarian neoplasms"[All Fields] OR ("ovarian"[All Fields] AND "tumour"[All Fields]) OR "ovarian tumour"[All Fields]) OR ("ovarian neoplasms"[MeSH Terms] OR ("ovarian"[All Fields] AND "neoplasms"[All Fields]) OR "ovarian neoplasms"[All Fields] OR ("ovarian"[All Fields] AND "tumor"[All Fields]) OR "ovarian tumor"[All Fields]) OR (("ovarian"[All Fields] OR "ovarians"[All Fields]) AND ("malign"[All Fields] OR "malignance"[All Fields] OR "malignances"[All Fields] OR "malignant"[All Fields] OR "malignants"[All Fields] OR "malignities"[All Fields] OR "malignity"[All Fields] OR "malignization"[All Fields] OR "malignized"[All Fields] OR "maligns"[All Fields] OR "neoplasms"[MeSH Terms] OR "neoplasms"[All Fields] OR "malignancies"[All Fields] OR "malignancy"[All Fields])) OR (("femal"[All Fields] OR "female"[MeSH Terms] OR "female"[All Fields] OR "females"[All Fields] OR "female s"[All Fields] OR "femals"[All Fields]) AND ("malign"[All Fields] OR "malignance"[All Fields] OR "malignances"[All Fields] OR "malignant"[All Fields] OR "malignants"[All Fields] OR "malignities"[All Fields] OR "malignity"[All Fields] OR "malignization"[All Fields] OR "malignized"[All Fields] OR "maligns"[All Fields] OR "neoplasms"[MeSH  Terms] OR "neoplasms"[All Fields] OR "malignancies"[All Fields] OR "malignancy"[All Fields])) |
| --- | --- | --- | --- |
| **14** | **female malignancies** | Publication Date | ("femal"[All Fields] OR "female"[MeSH Terms] OR "female"[All Fields] OR  "females"[All Fields] OR "female s"[All Fields] OR "femals"[All Fields]) AND ("malign"[All Fields] OR "malignance"[All Fields] OR "malignances"[All Fields] OR "malignant"[All Fields] OR "malignants"[All Fields] OR "malignities"[All Fields] OR "malignity"[All Fields] OR "malignization"[All  Fields] OR "malignized"[All Fields] OR "maligns"[All Fields] OR |

|  |  |  | "neoplasms"[MeSH Terms] OR "neoplasms"[All Fields] OR  "malignancies"[All Fields] OR "malignancy"[All Fields]) |
| --- | --- | --- | --- |
| 13 | **(((((((Epithelial Ovarian Cancer) OR (Ovarian Cancer)) OR (Gynecological Malignancies)) OR (Ovarian Carcinoma)) OR (Ovarian tumour)) OR (Ovarian tumor)) OR (ovarian malignancy))**  **AND (Selenium)** | Publication Date | ("carcinoma, ovarian epithelial"[MeSH Terms] OR ("carcinoma"[All Fields]  AND "ovarian"[All Fields] AND "epithelial"[All Fields]) OR "ovarian epithelial carcinoma"[All Fields] OR ("epithelial"[All Fields] AND "ovarian"[All Fields] AND "cancer"[All Fields]) OR "epithelial ovarian cancer"[All Fields] OR ("ovarian neoplasms"[MeSH Terms] OR ("ovarian"[All Fields] AND "neoplasms"[All Fields]) OR "ovarian neoplasms"[All Fields] OR ("ovarian"[All Fields] AND "cancer"[All Fields]) OR "ovarian cancer"[All Fields]) OR (("gynaecologic"[All Fields] OR "gynecologic"[All Fields] OR "gynecologically"[All Fields] OR "gynecology"[MeSH Terms] OR "gynecology"[All Fields] OR "gynaecological"[All Fields] OR "gynecological"[All Fields]) AND ("malign"[All Fields] OR "malignance"[All Fields] OR "malignances"[All Fields] OR "malignant"[All Fields] OR "malignants"[All Fields] OR "malignities"[All Fields] OR "malignity"[All Fields] OR "malignization"[All Fields] OR "malignized"[All Fields] OR "maligns"[All Fields] OR "neoplasms"[MeSH Terms] OR "neoplasms"[All Fields] OR "malignancies"[All Fields] OR "malignancy"[All Fields])) OR ("ovarian neoplasms"[MeSH Terms] OR ("ovarian"[All Fields] AND "neoplasms"[All Fields]) OR "ovarian neoplasms"[All Fields] OR ("ovarian"[All Fields] AND "carcinoma"[All Fields]) OR "ovarian carcinoma"[All Fields]) OR ("ovarian neoplasms"[MeSH Terms] OR ("ovarian"[All Fields] AND "neoplasms"[All Fields]) OR "ovarian neoplasms"[All Fields] OR ("ovarian"[All Fields] AND "tumour"[All Fields]) OR "ovarian tumour"[All Fields]) OR ("ovarian neoplasms"[MeSH Terms] OR ("ovarian"[All Fields] AND "neoplasms"[All Fields]) OR "ovarian neoplasms"[All Fields] OR ("ovarian"[All Fields] AND "tumor"[All Fields]) OR "ovarian tumor"[All Fields]) OR (("ovarian"[All Fields] OR "ovarians"[All Fields]) AND ("malign"[All Fields] OR "malignance"[All Fields] OR "malignances"[All Fields] OR "malignant"[All Fields] OR "malignants"[All Fields] OR "malignities"[All Fields] OR "malignity"[All Fields] OR "malignization"[All Fields] OR "malignized"[All Fields] OR "maligns"[All Fields] OR "neoplasms"[MeSH Terms] OR "neoplasms"[All Fields] OR "malignancies"[All Fields] OR "malignancy"[All Fields]))) AND ("selenium"[MeSH Terms] OR "selenium"[All Fields] OR "selenium s"[All  Fields] OR "seleniums"[All Fields]) |
| **12** | **((((((Epithelial Ovarian Cancer) OR (Ovarian Cancer)) OR (Gynecological Malignancies)) OR (Ovarian Carcinoma)) OR (Ovarian tumour))**  **OR (Ovarian tumor)) OR (ovarian malignancy)** | Publication Date | "carcinoma, ovarian epithelial"[MeSH Terms] OR ("carcinoma"[All Fields]  AND "ovarian"[All Fields] AND "epithelial"[All Fields]) OR "ovarian epithelial carcinoma"[All Fields] OR ("epithelial"[All Fields] AND "ovarian"[All Fields] AND "cancer"[All Fields]) OR "epithelial ovarian cancer"[All Fields] OR ("ovarian neoplasms"[MeSH Terms] OR ("ovarian"[All Fields] AND "neoplasms"[All Fields]) OR "ovarian neoplasms"[All Fields] OR ("ovarian"[All Fields] AND "cancer"[All Fields]) OR "ovarian cancer"[All Fields]) OR (("gynaecologic"[All Fields] OR "gynecologic"[All Fields] OR "gynecologically"[All Fields] OR "gynecology"[MeSH Terms] OR "gynecology"[All Fields] OR "gynaecological"[All Fields] OR  "gynecological"[All Fields]) AND ("malign"[All Fields] OR "malignance"[All |

|  |  |  | Fields] OR "malignances"[All Fields] OR "malignant"[All Fields] OR  "malignants"[All Fields] OR "malignities"[All Fields] OR "malignity"[All Fields] OR "malignization"[All Fields] OR "malignized"[All Fields] OR "maligns"[All Fields] OR "neoplasms"[MeSH Terms] OR "neoplasms"[All Fields] OR "malignancies"[All Fields] OR "malignancy"[All Fields])) OR ("ovarian neoplasms"[MeSH Terms] OR ("ovarian"[All Fields] AND "neoplasms"[All Fields]) OR "ovarian neoplasms"[All Fields] OR ("ovarian"[All Fields] AND "carcinoma"[All Fields]) OR "ovarian carcinoma"[All Fields]) OR ("ovarian neoplasms"[MeSH Terms] OR ("ovarian"[All Fields] AND "neoplasms"[All Fields]) OR "ovarian neoplasms"[All Fields] OR ("ovarian"[All Fields] AND "tumour"[All Fields]) OR "ovarian tumour"[All Fields]) OR ("ovarian neoplasms"[MeSH Terms] OR ("ovarian"[All Fields] AND "neoplasms"[All Fields]) OR "ovarian neoplasms"[All Fields] OR ("ovarian"[All Fields] AND "tumor"[All Fields]) OR "ovarian tumor"[All Fields]) OR (("ovarian"[All Fields] OR "ovarians"[All Fields]) AND ("malign"[All Fields] OR "malignance"[All Fields] OR "malignances"[All Fields] OR "malignant"[All Fields] OR "malignants"[All Fields] OR "malignities"[All Fields] OR "malignity"[All Fields] OR "malignization"[All Fields] OR "malignized"[All Fields] OR "maligns"[All Fields] OR "neoplasms"[MeSH Terms] OR "neoplasms"[All Fields] OR  "malignancies"[All Fields] OR "malignancy"[All Fields])) |
| --- | --- | --- | --- |
| **11** | **ovarian malignancy** | Publication Date | ("ovarian"[All Fields] OR "ovarians"[All Fields]) AND ("malign"[All Fields] OR  "malignance"[All Fields] OR "malignances"[All Fields] OR "malignant"[All Fields] OR "malignants"[All Fields] OR "malignities"[All Fields] OR "malignity"[All Fields] OR "malignization"[All Fields] OR "malignized"[All Fields] OR "maligns"[All Fields] OR "neoplasms"[MeSH Terms] OR "neoplasms"[All Fields] OR "malignancies"[All Fields] OR "malignancy"[All  Fields]) |
| **10** | (**Selenium) AND ((((((Epithelial Ovarian Cancer) OR (Ovarian Cancer)) OR (Gynecological Malignancies)) OR (Ovarian Carcinoma)) OR (Ovarian tumour)) OR**  **(Ovarian tumor))** | Publication Date | ("selenium"[MeSH Terms] OR "selenium"[All Fields] OR "selenium s"[All  Fields] OR "seleniums"[All Fields]) AND ("carcinoma, ovarian epithelial"[MeSH Terms] OR ("carcinoma"[All Fields] AND "ovarian"[All Fields] AND "epithelial"[All Fields]) OR "ovarian epithelial carcinoma"[All Fields] OR ("epithelial"[All Fields] AND "ovarian"[All Fields] AND "cancer"[All Fields]) OR "epithelial ovarian cancer"[All Fields] OR ("ovarian neoplasms"[MeSH Terms] OR ("ovarian"[All Fields] AND "neoplasms"[All Fields]) OR "ovarian neoplasms"[All Fields] OR ("ovarian"[All Fields] AND "cancer"[All Fields]) OR "ovarian cancer"[All Fields]) OR (("gynaecologic"[All Fields] OR "gynecologic"[All Fields] OR "gynecologically"[All Fields] OR "gynecology"[MeSH Terms] OR "gynecology"[All Fields] OR "gynaecological"[All Fields] OR "gynecological"[All Fields]) AND ("malign"[All Fields] OR "malignance"[All Fields] OR "malignances"[All Fields] OR "malignant"[All Fields] OR "malignants"[All Fields] OR "malignities"[All Fields] OR "malignity"[All Fields] OR "malignization"[All Fields] OR "malignized"[All Fields] OR "maligns"[All Fields] OR "neoplasms"[MeSH Terms] OR "neoplasms"[All Fields] OR "malignancies"[All Fields] OR "malignancy"[All Fields])) OR ("ovarian  neoplasms"[MeSH Terms] OR ("ovarian"[All Fields] AND "neoplasms"[All |

|  |  |  | Fields]) OR "ovarian neoplasms"[All Fields] OR ("ovarian"[All Fields] AND  "carcinoma"[All Fields]) OR "ovarian carcinoma"[All Fields]) OR ("ovarian neoplasms"[MeSH Terms] OR ("ovarian"[All Fields] AND "neoplasms"[All Fields]) OR "ovarian neoplasms"[All Fields] OR ("ovarian"[All Fields] AND "tumour"[All Fields]) OR "ovarian tumour"[All Fields]) OR ("ovarian neoplasms"[MeSH Terms] OR ("ovarian"[All Fields] AND "neoplasms"[All Fields]) OR "ovarian neoplasms"[All Fields] OR ("ovarian"[All Fields] AND  "tumor"[All Fields]) OR "ovarian tumor"[All Fields])) |
| --- | --- | --- | --- |
| **9** | **Selenium** | Publication  Date | "selenium"[MeSH Terms] OR "selenium"[All Fields] OR "selenium s"[All  Fields] OR "seleniums"[All Fields] |
| 8 | **(((((Epithelial Ovarian Cancer) OR (Ovarian Cancer)) OR (Gynecological Malignancies)) OR (Ovarian Carcinoma)) OR (Ovarian tumour))**  **OR (Ovarian tumor)** | Publication Date | "carcinoma, ovarian epithelial"[MeSH Terms] OR ("carcinoma"[All Fields]  AND "ovarian"[All Fields] AND "epithelial"[All Fields]) OR "ovarian epithelial carcinoma"[All Fields] OR ("epithelial"[All Fields] AND "ovarian"[All Fields] AND "cancer"[All Fields]) OR "epithelial ovarian cancer"[All Fields] OR ("ovarian neoplasms"[MeSH Terms] OR ("ovarian"[All Fields] AND "neoplasms"[All Fields]) OR "ovarian neoplasms"[All Fields] OR ("ovarian"[All Fields] AND "cancer"[All Fields]) OR "ovarian cancer"[All Fields]) OR (("gynaecologic"[All Fields] OR "gynecologic"[All Fields] OR "gynecologically"[All Fields] OR "gynecology"[MeSH Terms] OR "gynecology"[All Fields] OR "gynaecological"[All Fields] OR "gynecological"[All Fields]) AND ("malign"[All Fields] OR "malignance"[All Fields] OR "malignances"[All Fields] OR "malignant"[All Fields] OR "malignants"[All Fields] OR "malignities"[All Fields] OR "malignity"[All Fields] OR "malignization"[All Fields] OR "malignized"[All Fields] OR "maligns"[All Fields] OR "neoplasms"[MeSH Terms] OR "neoplasms"[All Fields] OR "malignancies"[All Fields] OR "malignancy"[All Fields])) OR ("ovarian neoplasms"[MeSH Terms] OR ("ovarian"[All Fields] AND "neoplasms"[All Fields]) OR "ovarian neoplasms"[All Fields] OR ("ovarian"[All Fields] AND "carcinoma"[All Fields]) OR "ovarian carcinoma"[All Fields]) OR ("ovarian neoplasms"[MeSH Terms] OR ("ovarian"[All Fields] AND "neoplasms"[All Fields]) OR "ovarian neoplasms"[All Fields] OR ("ovarian"[All Fields] AND "tumour"[All Fields]) OR "ovarian tumour"[All Fields]) OR ("ovarian neoplasms"[MeSH Terms] OR ("ovarian"[All Fields] AND "neoplasms"[All Fields]) OR "ovarian neoplasms"[All Fields] OR ("ovarian"[All Fields] AND "tumor"[All Fields]) OR  "ovarian tumor"[All Fields]) |
| 7 | **Ovarian tumor** | Publication Date | "ovarian neoplasms"[MeSH Terms] OR ("ovarian"[All Fields] AND  "neoplasms"[All Fields]) OR "ovarian neoplasms"[All Fields] OR ("ovarian"[All Fields] AND "tumor"[All Fields]) OR "ovarian tumor"[All  Fields] |
| 6 | **Ovarian tumour** | Publication Date | "ovarian neoplasms"[MeSH Terms] OR ("ovarian"[All Fields] AND  "neoplasms"[All Fields]) OR "ovarian neoplasms"[All Fields] OR ("ovarian"[All Fields] AND "tumour"[All Fields]) OR "ovarian tumour"[All  Fields] |
| 5 | **(((Epithelial Ovarian Cancer) OR (Ovarian**  **Cancer)) OR (Gynecological Malignancies)) OR**  **(Ovarian Carcinoma)** | Publication Date | "carcinoma, ovarian epithelial"[MeSH Terms] OR ("carcinoma"[All Fields]  AND "ovarian"[All Fields] AND "epithelial"[All Fields]) OR "ovarian epithelial  carcinoma"[All Fields] OR ("epithelial"[All Fields] AND "ovarian"[All Fields] |

|  |  |  | AND "cancer"[All Fields]) OR "epithelial ovarian cancer"[All Fields] OR  ("ovarian neoplasms"[MeSH Terms] OR ("ovarian"[All Fields] AND "neoplasms"[All Fields]) OR "ovarian neoplasms"[All Fields] OR ("ovarian"[All Fields] AND "cancer"[All Fields]) OR "ovarian cancer"[All Fields]) OR (("gynaecologic"[All Fields] OR "gynecologic"[All Fields] OR "gynecologically"[All Fields] OR "gynecology"[MeSH Terms] OR "gynecology"[All Fields] OR "gynaecological"[All Fields] OR "gynecological"[All Fields]) AND ("malign"[All Fields] OR "malignance"[All Fields] OR "malignances"[All Fields] OR "malignant"[All Fields] OR "malignants"[All Fields] OR "malignities"[All Fields] OR "malignity"[All Fields] OR "malignization"[All Fields] OR "malignized"[All Fields] OR "maligns"[All Fields] OR "neoplasms"[MeSH Terms] OR "neoplasms"[All Fields] OR "malignancies"[All Fields] OR "malignancy"[All Fields])) OR ("ovarian neoplasms"[MeSH Terms] OR ("ovarian"[All Fields] AND "neoplasms"[All Fields]) OR "ovarian neoplasms"[All Fields] OR ("ovarian"[All Fields] AND "carcinoma"[All Fields]) OR "ovarian  carcinoma"[All Fields]) |
| --- | --- | --- | --- |
| **4** | **Ovarian Carcinoma** | Publication Date | "ovarian neoplasms"[MeSH Terms] OR ("ovarian"[All Fields] AND  "neoplasms"[All Fields]) OR "ovarian neoplasms"[All Fields] OR ("ovarian"[All Fields] AND "carcinoma"[All Fields]) OR "ovarian  carcinoma"[All Fields] |
| **3** | **Gynecological Malignancies** | Publication Date | ("gynaecologic"[All Fields] OR "gynecologic"[All Fields] OR  "gynecologically"[All Fields] OR "gynecology"[MeSH Terms] OR "gynecology"[All Fields] OR "gynaecological"[All Fields] OR "gynecological"[All Fields]) AND ("malign"[All Fields] OR "malignance"[All Fields] OR "malignances"[All Fields] OR "malignant"[All Fields] OR "malignants"[All Fields] OR "malignities"[All Fields] OR "malignity"[All Fields] OR "malignization"[All Fields] OR "malignized"[All Fields] OR "maligns"[All Fields] OR "neoplasms"[MeSH Terms] OR "neoplasms"[All  Fields] OR "malignancies"[All Fields] OR "malignancy"[All Fields]) |
| **2** | **Ovarian Cancer** | Publication Date | "ovarian neoplasms"[MeSH Terms] OR ("ovarian"[All Fields] AND  "neoplasms"[All Fields]) OR "ovarian neoplasms"[All Fields] OR ("ovarian"[All Fields] AND "cancer"[All Fields]) OR "ovarian cancer"[All  Fields] |
| **1** | **Epithelial Ovarian Cancer** | Publication Date | "carcinoma, ovarian epithelial"[MeSH Terms] OR ("carcinoma"[All Fields]  AND "ovarian"[All Fields] AND "epithelial"[All Fields]) OR "ovarian epithelial carcinoma"[All Fields] OR ("epithelial"[All Fields] AND "ovarian"[All Fields]  AND "cancer"[All Fields]) OR "epithelial ovarian cancer"[All Fields] |
