# Supplementary material
Source: Research Square preprint supplement (doi:10.21203/rs.3.rs-9660701/v1)
Supplement: Supplementary file 5 [file efa73b5219ff34398cbd2b72.docx]

|  | **Author** | **Reason for exclusion** |
| --- | --- | --- |
| 1 | Sundstrom et al.1984 | Case-control study. Blood was drawn from ovarian cancer patients (after diagnosis) to determine the serum Se concentration. Therefore it cannot take as an assessment of the association between Se as an etiological  factor and Epithelial Ovarian Cancer. |
| 2 | Bierke & Svedfnstal (1994) | Animal study |
| 3 | Drózdz et al. (1989) | Case-control study. Blood was drawn from ovarian cancer patients (after diagnosis) to determine the serum Se concentration.  Therefore it cannot take as an assessment of the association between Se as an etiological factor and Epithelial Ovarian Cancer. |
| 4 | Argirovic et al.(1995) | Case-control study. Blood was drawn from ovarian cancer patients (after diagnosis) to determine the serum Se concentration.  Therefore it cannot take as an assessment of the association between Se as an etiological factor and Epithelial Ovarian Cancer. |
| 5 | Fengxia & Shiwei (1991) | Case-control study. Blood was drawn from ovarian cancer patients (after diagnosis) to determine the serum Se concentration.  Therefore it cannot take as an assessment of the association between Se as an etiological factor and Epithelial Ovarian Cancer. |
| 6 | Miiller-Lepper et al.(1993) | Case-control study. Blood was drawn from ovarian cancer patients (after diagnosis) to determine the serum Se concentration.  Therefore it cannot take as an assessment of the association between Se as an etiological factor and Epithelial Ovarian Cancer. |
| 7 | Caglayan et al.(2019) | Case-control study. Blood was drawn from ovarian cancer patients (after diagnosis) to determine the serum Se concentration.  Therefore it cannot take as an assessment of the association between Se as an etiological factor and Epithelial Ovarian Cancer. |
| 8 | Canaz et al.(2017) | Case-series |
| 9 | Chrissafidou et al. (2002) | Case-control study. Blood was drawn from ovarian cancer patients (after diagnosis) to determine the serum Se concentration.  Therefore it cannot take as an assessment of |

|  |  | the association between Se as an etiological  factor and Epithelial Ovarian Cancer. |
| --- | --- | --- |
| 10 | Das & Ma(1986) | Case-control study. Blood was drawn from ovarian cancer patients (after diagnosis) to determine the serum Se concentration.  Therefore it cannot take as an assessment of the association between Se as an etiological factor and Epithelial Ovarian Cancer. |
| 11 | Dziaman et al.(2009) | Randomized control study. Blood was drawn from ovarian cancer patients (after diagnosis) to determine the serum Se concentration.  Therefore it cannot take as an assessment of the association of Se as an etiological factor for Epithelial Ovarian Cancer. |
| 12 | Diet & Cancer (2014) | This abstract is a duplication of the study  included in the review (Gifkins et al.2012) |
| 13 | Gorozhanskaya et al.(2012) | Case-control study. There were no risk  estimates and also data was not provided to calculate risk estimates. |
| 14 | Guo et al.(2020) | This is a Mendelian randomization analysis. |
| 15 | Motevich et al. (2015) | Case-control study. The tissue concentration of Se of ovarian cancer patients (after diagnosis) was compared with the tissue concentration of Se of healthy ovaries.  Therefore it cannot take as an assessment of the association between Se as an etiological factor and Epithelial Ovarian Cancer. |
| 16 | Piekutowski et al.(2006) | Case-control study. Blood was drawn from ovarian cancer patients (after diagnosis) to determine the serum Se concentration.  Therefore it cannot take as an assessment of the association between Se as an etiological factor and Epithelial Ovarian Cancer. |
| 17 | Tan et al.(2018) | Case-series |
| 18 | Torun et al.(1995) | Case-control study. Blood was drawn from ovarian cancer patients (after diagnosis) to determine the serum Se concentration.  Therefore it cannot take as an assessment of the association between Se as an etiological factor and Epithelial Ovarian Cancer. |
| 19 | Vinceti et al.(2016) | It’s a review |
| 20 | Wadhwa et al. (2015) | Case-control study. There were no risk estimates and also data was not provided to  calculate risk estimates. |
